# Supplementary material
Source: PubMed Central journal article supplement (PMC7241578)
Supplement: NIHMS1583890-supplement-1.pdf [file NIHMS1583890-supplement-1.pdf]

## SUPPLEMENTARY MATERIAL

### **EPA Method #556**

The EPA Method #556 (Scheme 2), used previously for the analysis of the Murchison meteorite (Pizzarello and Holmes, 2009), is carried out as follows: carbonyl compounds are derivatized in water (pH = 4) by adding 1 mL of a 15 mg/mL *O*-(2,3,4,5,6-Pentafluorobenzyl) hydroxylamine hydrochloride (PFBHA) solution and heating the solution at 35°C for 2 hours. Following the derivatization step, 2-4 drops of concentrated H<sub>2</sub>SO<sub>4</sub> are added to the sample to prevent extraction of excess PFBHA reagent. The PFBHA derivatives are extracted from solution with hexane and transferred to a vial containing 0.2 N H<sub>2</sub>SO<sub>4</sub>, as an acid-wash step. The hexane layer, containing the PFBHA derivatives, is then isolated, concentrated to a small volume via evaporation, and analyzed via GC-MS.

**Table S1.** A summary, adapted from Rodigast et al. (2015), of the experimental conditions used for aqueous phase derivatization and extraction of aldehydes and/or ketones.

| PFBHA (mg/mL)                  | Derivatization time            | Derivatization temperature | Extraction solvent | Extraction time (min) | Reference                    |
|--------------------------------|--------------------------------|----------------------------|--------------------|-----------------------|------------------------------|
| 0.1                            | 40 min aldehydes, 24 h ketones | Room temp.                 | Ethyl acetate      | –                     | Kobayashi et al. (1980)      |
| 0.1                            | 2 h (longer for ketones)       | Room temp.                 | Hexane             | 0.5                   | Glaze et al. (1989)          |
| 1                              | 1 h aldehydes, 1 day ketones   | Room temp.                 | Hexane             | –                     | Yamada and Somiya (1989)     |
| >10-fold excess                | 24 h                           | Room temp.                 | Hexane, MTBE       | 1                     | Le Lacheur et al. (1993)     |
| 0.75                           | 2 h                            | 35°C                       | Hexane             | 3                     | EPA Method 556 (1998)        |
| 0.8                            | 20 s                           | 900 W                      | Toluene            | –                     | Strassnig et al. (2000)      |
| 0.5                            | 24 h                           | Room temp.                 | Dichloromethane    | –                     | Spaulding and Charles (2002) |
| 0.06                           | 4 h                            | 60°C                       | –                  | –                     | Sugaya et al. (2004)         |
| 0.2                            | 24-96 h                        | Room temp.                 | Hexane             | –                     | Seaman et al. (2006)         |
| 0.06                           | 2 h                            | Room temp.                 | –                  | –                     | Hudson et al. (2007)         |
| –                              | 4 h                            | Room temp.                 | –                  | –                     | Takeuchi et al. (2007)       |
| 0.75                           | 10 min                         | Room temp.                 | –                  | –                     | Saison et al. (2009)         |
| <i>Followed EPA Method 556</i> |                                |                            |                    |                       | Pizzarello and Holmes (2009) |
| 0.05                           | <10 min                        | Room temp.                 | Chlorobenzene      | 2                     | Ye et al. (2011)             |
| 0.5                            | 1 min                          | 60°C                       | Hexane             | 1                     | Serrano et al. (2013)        |
| –                              | 45 min                         | –                          | Dichloromethane    | –                     | de Marcellus et al. (2015)   |
| 0.4                            | 24 h                           | –                          | Dichloromethane    | 30                    | Rodigast et al. (2015)       |

*Dash line – parameter not reported*

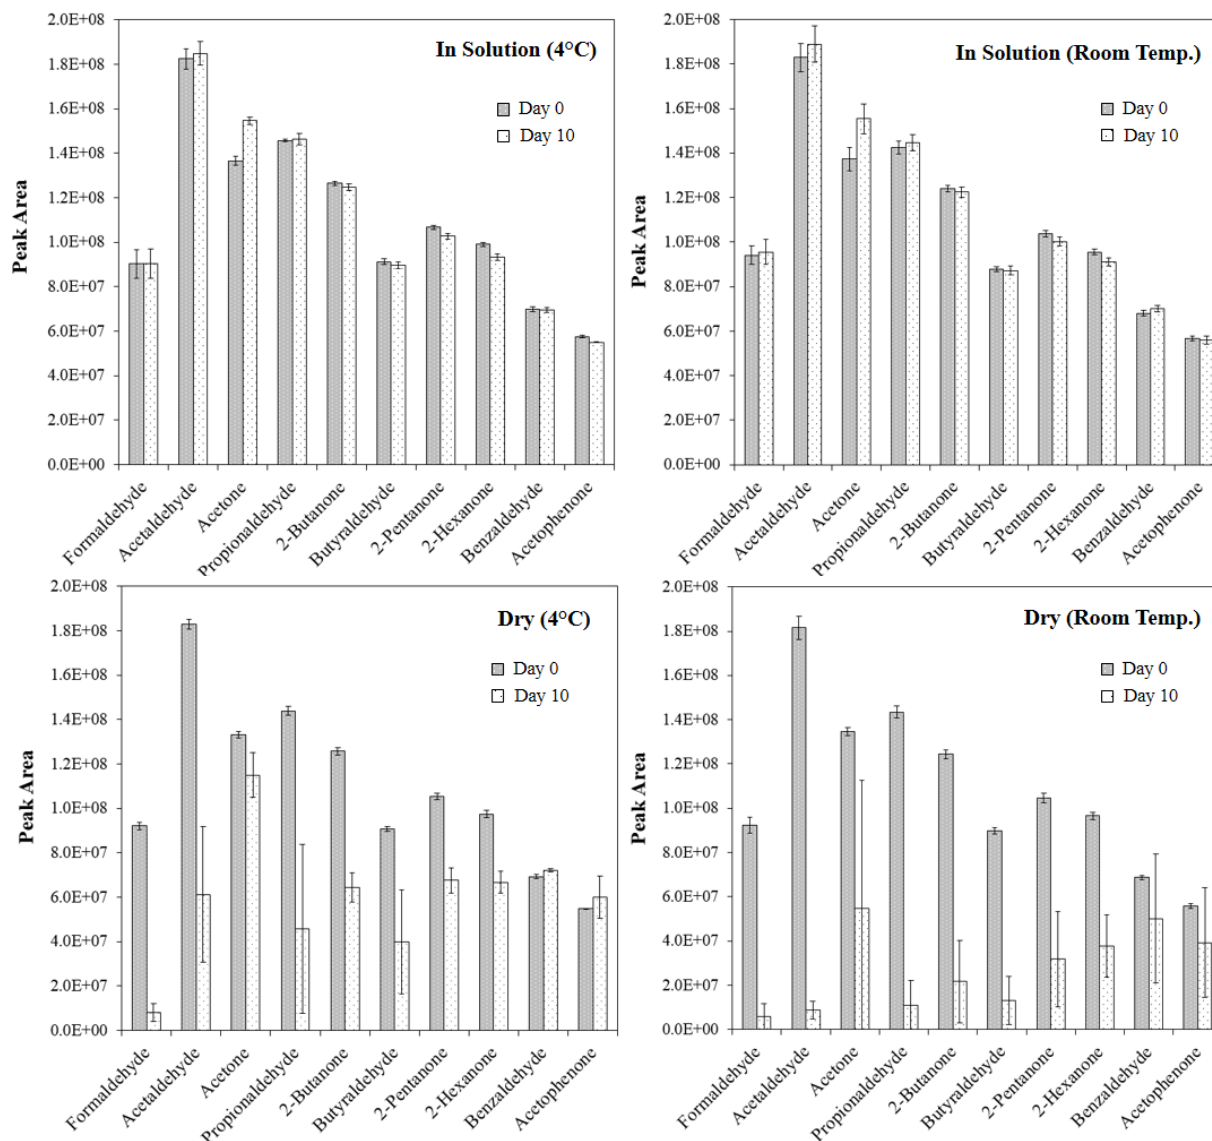

**Figure S1.** Abundances (GC-MS peak areas) of aldehyde and ketone derivatives (initial concentrations: 50  $\mu\text{g/mL}$ ) before and after storage at 4°C or room temperature. Dichloromethane was used as the extraction solvent for all samples. Solutions were evaporated to 1 mL volumes under a stream of nitrogen prior to the first GC-MS run (Day 0). Samples stored in solution were stored in their 1 mL volumes for 10 days. Samples stored dry were evaporated to dryness under a stream of nitrogen, immediately re-capped, stored dry for 10 days, and then re-constituted in 1 mL dichloromethane prior to the second GC-MS run (Day 10). All measurements were calibrated against an external standard (50  $\mu\text{g/mL}$  underivatized acetophenone) to adjust for instrumental variations. Each bar represents an average of 3 replicate samples, and error bars represent one standard deviation from the mean.

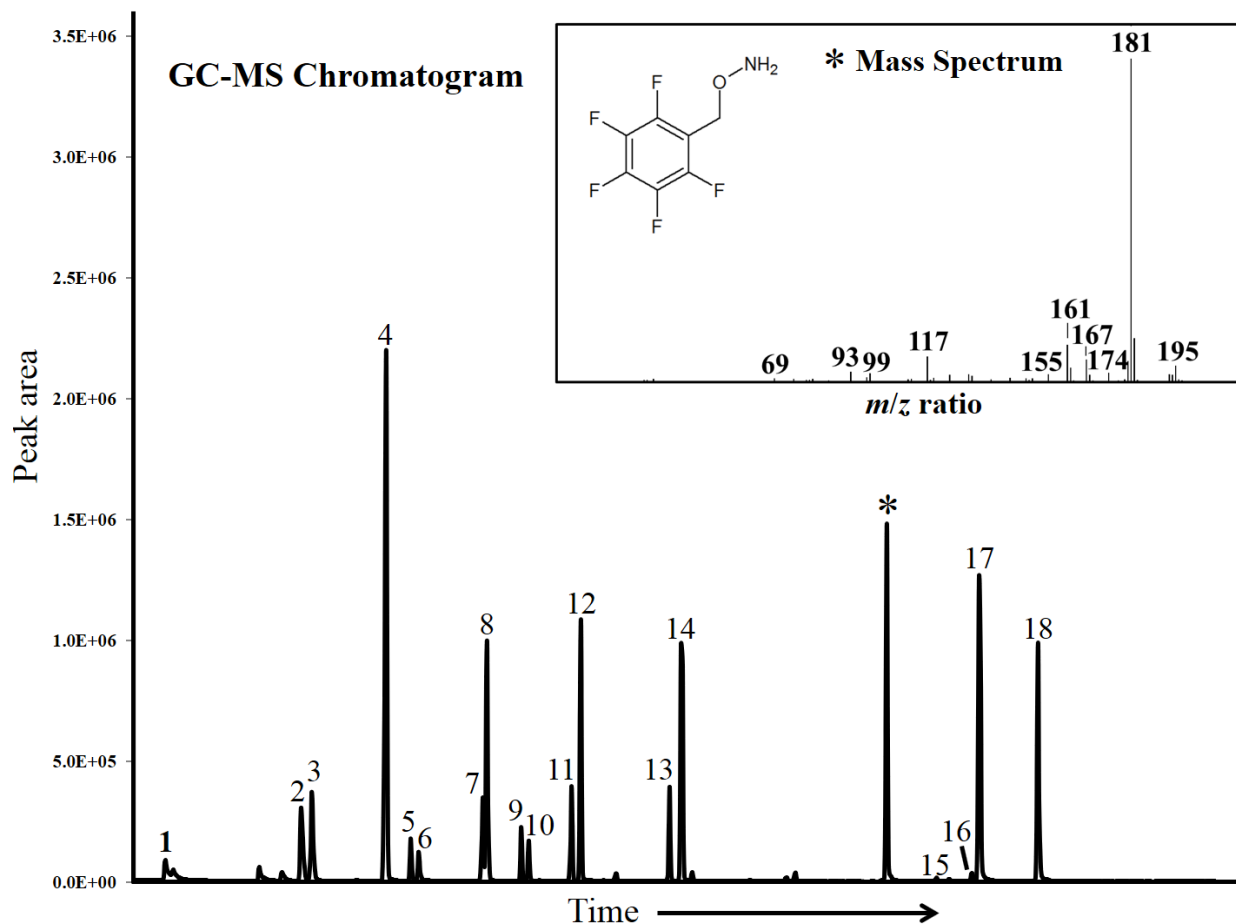

**Figure S2.** GC-MS chromatogram of aldehyde and ketone derivatives in dichloromethane after dry storage at 4°C for 10 days (initial concentrations: 50 µg/mL). The identities of the peaks are presented in Table 1. The GC-MS peak labeled with an asterisk is a decomposition product that was only observed in samples that had been stored dry. The mass spectrum displayed above the chromatogram represents the mass spectrum and compound identification provided by the NIST Mass Spectral Library for the decomposition product(\*).

## SUPPLEMENTARY REFERENCES

- de Marcellus, P., C. Meinert, I. Myrgorodska, L. Nahon, T. Buhse, L. Le Sergeant D'Hendecourt, and U. J. Meierhenrich (2015) Aldehydes and sugars from evolved precometary ice analogs: Importance of ices in astrochemical and prebiotic evolution. *PNAS* **112**, 965-970.
- EPA Method 556: Determination of carbonyl compounds in drinking water by pentafluorobenzylhydroxylamine derivatization and capillary gas chromatography with electron capture detection (1998) National exposure research laboratory office of research and development. US Environmental Protection Agency, Cincinnati, Ohio, 45268.
- Glaze, W. H., M. Koga and D. Cancilla (1989) Ozonation byproducts. 2. Improvement of an aqueous-phase derivatization method for the detection of formaldehyde and other carbonyl compounds formed by the ozonation of drinking water. *Environmental Science & Technology* **23**, 838-847.
- Hudson, E. D., K. Okuda, and P. A. Ariya (2007) Determination of acetone in seawater using derivatization solid-phase microextraction. *Analytical and Bioanalytical Chemistry* **388**, 1275-1282.
- Kobayashi, K., M. Tanaka, and S. Kawai (1980) Gas chromatographic determination of low-molecular-weight carbonyl compounds in aqueous solution as their O-(2,3,4,5,6-pentafluorobenzyl) oximes. *Journal of Chromatography* **187**, 413-417.
- Le Lacheur, R. M., L. B. Sonnenberg, P. C. Singer, R. F. Christman, and M. J. Charles (1993) Identification of carbonyl compounds in environmental samples. *Environmental Science & Technology* **27**, 2745-2753.
- Pizzarello, S. and W. Holmes (2009) Nitrogen-containing compounds in two CR2 meteorites: <sup>15</sup>N composition, molecular distribution and precursor molecules. *Geochimica et Cosmochimica Acta* **73**, 2150-2162.
- Rodigast, M., A. Mutzel, Y. Inuma, S. Haferkorn, and H. Herrmann (2015) Characterisation and optimization of a sample preparation method for the detection and quantification of atmospherically relevant carbonyl compounds in aqueous medium. *Atmospheric Measurement Technique* **8**, 2409-2416.
- Saison, D., D. P. De Schutter, F. DeIvaux, F. R. Delvaux (2009) Determination of carbonyl compounds in beer by derivatization and headspace solid-phase microextraction in

1 combination with gas chromatography and mass spectrometry. *Journal of*  
2 *Chromatography A* **1216**, 5061-5068. Seaman, V. Y., M. J. Charles, and T. M. Cahill  
3 (2006) A sensitive method for the quantification of acrolein and other volatile carbonyls in  
4 ambient air. *Analytical Chemistry* **78**, 2405-2412.

5 Serrano, M., M. Silva, and M. Gallego (2013) Development of an environment-friendly  
6 microextraction method for the determination of aliphatic and aromatic aldehydes in water.  
7 *Analytica Chimica Acta* **784**, 77-84.

8 Spaulding, R. S., and M. J. Charles (2002) Comparison of methods for extraction, storage, and  
9 silylation of pentafluorobenzyl derivatives of carbonyl compounds and multi-functional  
10 carbonyl compounds. *Analytical and Bioanalytical Chemistry* **372**, 808-816.

11 Strassnig, S., T. Wenzl, and E. P. Lankmayr (2000) Microwave-assisted derivatization of volatile  
12 carbonyl compounds with *O*-(2,3,4,5,6-pentafluorobenzyl)hydroxylamine. *Journal of*  
13 *Chromatography* **891**, 267-273.

14 Sugaya, N., K. Sakurai, T. Nakagawa, N. Onda, S. Onodera, M. Morita, and M. Tezuka (2004)  
15 Development of a headspace GC-MS analysis of carbonyl compounds (aldehydes and  
16 ketones) in household products after derivatization with *O*-(2,3,4,5,6-pentafluorobenzyl)-  
17 hydroxylamine. *Analytical Sciences* **20**, 865-870.

18 Takeuchi, A., T. Takigawa, M. Abe, T. Kawai, Y. Endo, T. Yasugi, G. Endo, and K. Ogino (2007)  
19 Determination of formaldehyde in urine by headspace gas chromatography. *Bulletin of*  
20 *Environmental Contamination and Toxicology* **79**, 1-4.

21 Yabuta, H., G. D. Cody, and C. M. O'D. Alexander (2007) Chondritic organic matter as an  
22 indicator of nebular and parent body processing: Extended pyrolysis studies for CM, CI,  
23 CR, CO, CV, ordinary and Tagish Lake group meteorites. *38<sup>th</sup> Lunar and Planetary*  
24 *Science Conference* contribution #2304.

25 Yamada, H., and I. Somiya (1989) The determination of carbonyl compounds in ozonated water  
26 by the PFBOA method. *Ozone Science & Engineering* **11**, 127-141.

27 Ye, Q., D. Zheng, L. Liu, and L. Hong (2011) Rapid analysis of aldehydes by simultaneous  
28 microextraction and derivatization followed by GC-MS. *Journal of Separation Science* **34**,  
29 1607-1612.

30  
31
